# Supplementary material for: Effects of LED Light Colors on the Growth Performance, Intestinal Morphology, Cecal Short-Chain Fatty Acid Concentrations and Microbiota in Broilers
Source: MDPI journal article supplement (doi:10.3390/ani13233731), 2023-12-01
Supplement: s1 [file s1]

# Supplementary Materials

**Supplementary Table S1.** Composition and nutrient levels of diets.

| Items                               | 1 to 21 d | 22 to 42 d |
|-------------------------------------|-----------|------------|
| Ingredients (g/kg)                  |           |            |
| Corn                                | 42.10     | 42.30      |
| Wheat                               | 20.00     | 25.00      |
| Soybean meal                        | 28.40     | 21.20      |
| Corn gluten meal                    | 4.00      | 4.50       |
| Soybean oil                         | 1.50      | 3.00       |
| Premix <sup>1</sup>                 | 4.00      | 4.00       |
| Total                               | 100.00    | 100.00     |
| Nutrient levels <sup>2</sup> (g/kg) |           |            |
| ME <sup>2,4</sup> /(MJ/kg)          | 12.30     | 12.97      |
| CP <sup>3,4</sup>                   | 20.92     | 20.35      |
| Calcium <sup>4</sup>                | 1.00      | 1.00       |
| Available phosphorus <sup>4</sup>   | 0.40      | 0.45       |
| Lysine <sup>4</sup>                 | 1.15      | 1.10       |
| Methionine <sup>4</sup>             | 0.52      | 0.41       |

<sup>1</sup> The premix provided the following per kg of the diets: Vitamin A 120000 IU, Vitamin D<sub>3</sub> 2500 IU, Vitamin E 20 mg, Vitamin K<sub>3</sub> 3 mg, Vitamin B<sub>1</sub> 3 mg, Vitamin B<sub>2</sub> 8 mg, Vitamin B<sub>12</sub> 0.03 mg, Pantothenic 20 mg, Nicotinic acid 50 mg, Biotin 0.1 mg, Folic acid 1.5 mg, Cu 9 mg, Zn 110 mg, Fe 100 mg, Mn 100 mg, Se 0.16 mg, I 0.6 mg;

<sup>2</sup> ME: Metabolizable energy;

<sup>3</sup> CP: Crude protein;

<sup>4</sup> All values except the amino acids and available phosphorus are measured.

**Supplementary Table S2.** The average body weight of the groups

| Periods | Average body weight (g) |             |            |                  |
|---------|-------------------------|-------------|------------|------------------|
|         | White light             | Green light | Blue light | Blue-green light |
| 21 d    | 797.22                  | 780.34      | 826.93     | 796.19           |
| 42 d    | 2341.28                 | 2211.00     | 2485.38    | 2449.17          |

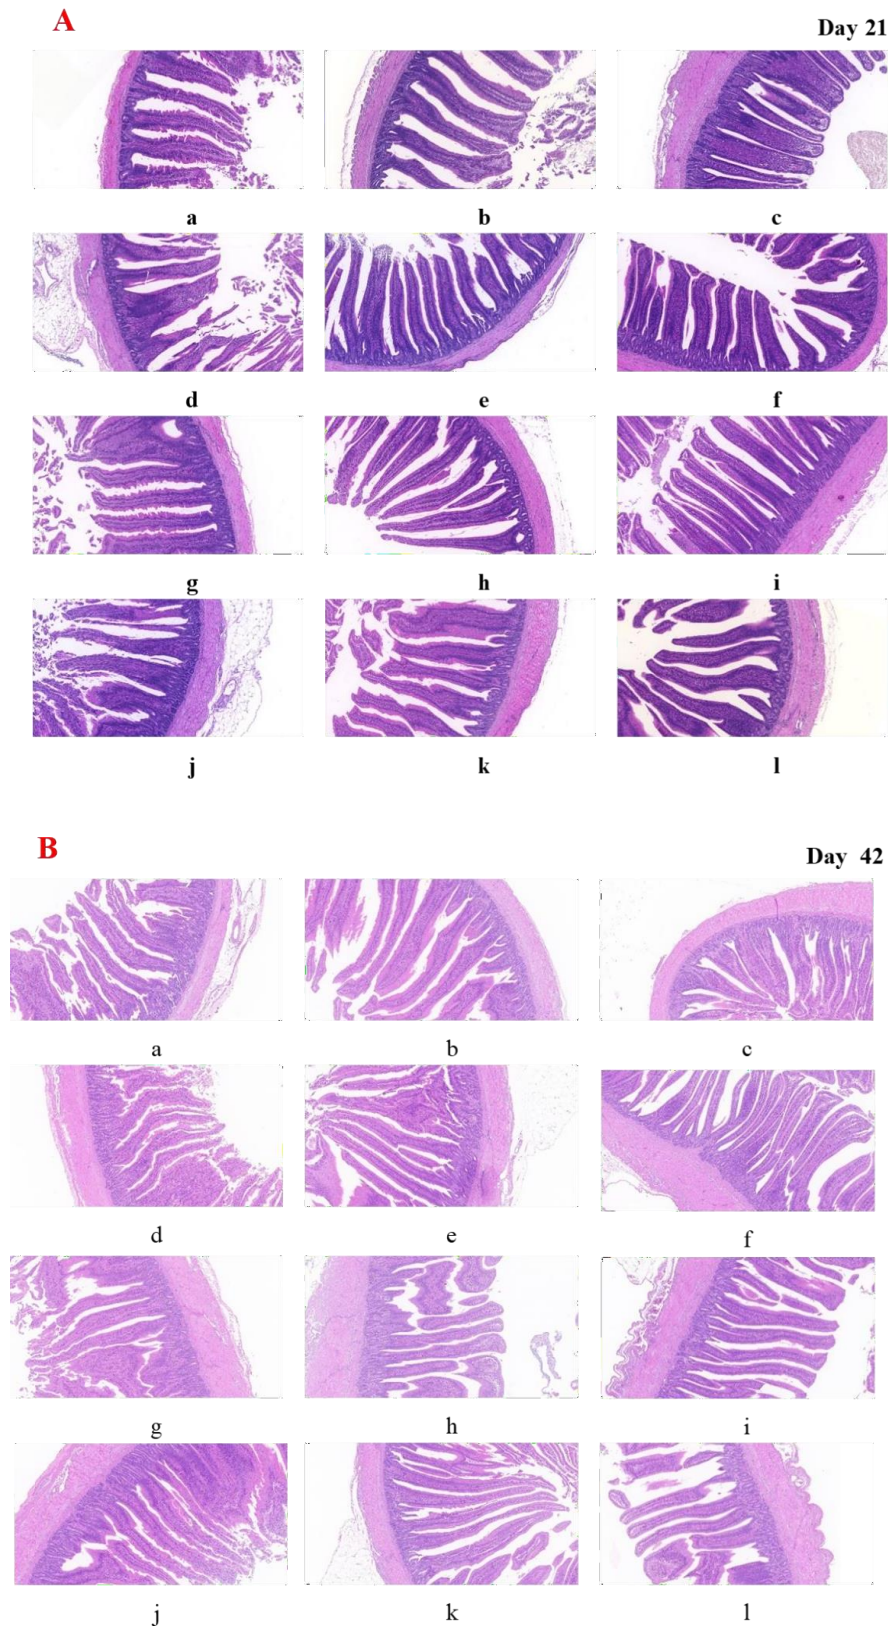

**Supplementary Figure S1.** Morphology of intestinal mucosa in each group at day 21(A) and at day 42 (B); (a) duodenum of W group; (b) jejunum of W group; (c) ileum of W group; (d) duodenum of G group; (e) jejunum of G group; (f) ileum of G group; (g) duodenum of B group; (h) jejunum of B group; (i) ileum of B group; (j) duodenum of BG group; (k) jejunum of BG group; (l) ileum of BG group.

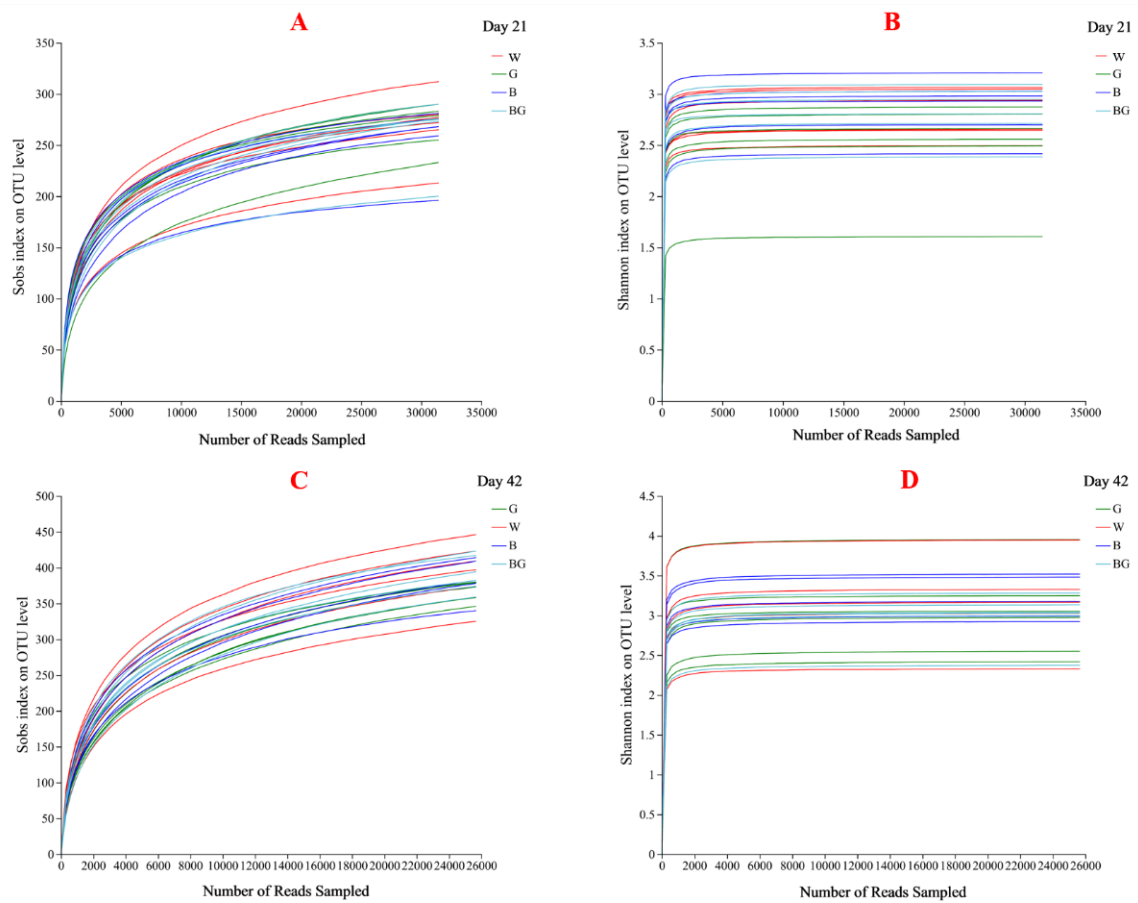

**Supplementary Figure S2.** Rarefaction curve; (A) Sobs rarefaction curve on day 21; (B) Shannon rarefaction curve on day 21; (C) Sobs rarefaction curve on day 42; (D) Shannon rarefaction curve on day 42.
